# Supplementary material for: Effectiveness and costs of a new framework for selecting absorbent urinary incontinence products compared with current practice: a cohort study
Source: HighWire-hosted journal article supplement (doi:10.1136/bmjopen-2021-059654), 2022-09-01
Supplement: bmjopen-2021-059654supp001_data_supplement.pdf [file bmjopen-2021-059654supp001_data_supplement.pdf]

## Supplementary file 1.

|                                                                                                               | Very unsatisfied | Unsatisfied | Neutral | Satisfied | Very satisfied |
|---------------------------------------------------------------------------------------------------------------|------------------|-------------|---------|-----------|----------------|
| How satisfied are you with your treatment for incontinence?                                                   |                  |             |         |           |                |
| How satisfied are you with the incontinence materials you use?                                                |                  |             |         |           |                |
| To what extent are you satisfied with the freedom of choice regarding the care/treatment of you incontinence? |                  |             |         |           |                |
| To what extent are you satisfied with the freedom of choice regarding the choice of incontinence materials?   |                  |             |         |           |                |
| To what extent do the incontinence materials support your sleep?                                              |                  |             |         |           |                |
| To what extent do the incontinence materials support your daytime activities?                                 |                  |             |         |           |                |
