# Supplementary material for: Effectiveness and costs of a new framework for selecting absorbent urinary incontinence products compared with current practice: a cohort study
Source: HighWire-hosted journal article supplement (doi:10.1136/bmjopen-2021-059654), 2022-09-01
Supplement: bmjopen-2021-059654supp002_data_supplement.pdf [file bmjopen-2021-059654supp002_data_supplement.pdf]

| Specification of costs                          | Unit costs         |
|-------------------------------------------------|--------------------|
| <i>First-line services</i>                      |                    |
| General practitioner                            | €34/consultation   |
| Social work                                     | €68/consultation   |
| Occupational therapy                            | €34/consultation   |
| Domestic help                                   | €21/hour           |
| Personal care                                   | €52/hour           |
| Nursing                                         | €76/hour           |
| Physical therapy for UI                         | €34/consultation   |
| Acupuncture or homeopath for UI                 | €68/treatment      |
| <i>Medication for UI<sup>1</sup></i>            |                    |
| Darafenacin 15 mg                               | €0.55/per day      |
| Darafenacin 7.5 mg                              | €0.87/per day      |
| Fesoterodin 8 mg                                | €0.58/per day      |
| Fesoterodin 4 mg                                | €0.89/per day      |
| Oxybutinin 1 mg/ml oral solution                | €2.50/per day      |
| Oxybutinin 5 mg                                 | €0.23/per day      |
| Oxybutinin 2.5 mg                               | €0.35/per day      |
| Oxybutinin 3.9 mg transdermal patch             | €1.27/per day      |
| Solifenacin (generic) 10 mg                     | €0.40/per day      |
| Solifenacin (Vesicare) 10 mg                    | €0.58/per day      |
| Solifenacin (generic) 5 mg                      | €0.59/per day      |
| Solifenacin (Vesicare) 5 mg                     | €0.85/per day      |
| Solifenacin (Vesicare) 1 mg/ml oral solution    | €0.89/per day      |
| Tolterodin (generic) 4 mg controlled release    | €0.30/per day      |
| Tolterodin (Detrusitol) 4 mg controlled release | €0.71/per day      |
| Tolterodin (generic) 2 mg                       | €0.46/per day      |
| Tolterodin (Detrusitol) 2 mg                    | €0.89/per day      |
| Tolterodin (generic) 2 mg                       | €0.76/per day      |
| Tolterodin (Detrusitol) 2 mg                    | €0.89/per day      |
| Tolterodin (generic) 1 mg                       | €0.73/per day      |
| Tolterodin (Detrusitol) 1mg                     | €1.08/per day      |
| Flavoxaat 200 mg                                | €0.83/per day      |
| Mirabegron 5 mg                                 | €0.89/per day      |
| Costs of dispensing by pharmacy                 | €6.25/per delivery |
| <i>Incontinence pads<sup>2</sup></i>            |                    |
| Sanitary pad                                    | €0.14/per piece    |
| Disposable pads - small                         | €0.26/per piece    |
| Disposable pads – medium                        | €0.45/per piece    |
| Disposable pads – large                         | €0.63/per piece    |
| Insert pads                                     | €0.27/per piece    |
| T-shaped pads                                   | €1.19/per piece    |
| Disposable pants                                | €1.43/per piece    |
| All-in-ones                                     | €1.31/per piece    |
| Washable pants                                  | €0.99/per piece    |
| Bed underlays                                   | €0.49/per piece    |

---

*Second-line care*

|                                        |            |
|----------------------------------------|------------|
| Specialist consultation                | €270/visit |
| Admission in hospital                  | €497/day   |
| Other treatment for UI: Botox/PTNS/TVT | €324       |

---

*Other costs*

|                     |          |
|---------------------|----------|
| Productivity losses | €34/hour |
|---------------------|----------|

Unit costs are based on reference prices of the cost manual of the Dutch Healthcare Institute, except when stated otherwise. Costs have indexed for 2019.

1. Prices obtained from pharmacotherapeutic information website of the Dutch National Health Care Institute [14]

2. Prices obtained from one of the participating pharmacies
