# Supplementary material for: Effectiveness and costs of a new framework for selecting absorbent urinary incontinence products compared with current practice: a cohort study
Source: HighWire-hosted journal article supplement (doi:10.1136/bmjopen-2021-059654), 2022-09-01
Supplement: bmjopen-2021-059654supp003_data_supplement.pdf [file bmjopen-2021-059654supp003_data_supplement.pdf]

## Supplementary file 2.

|                               | Intervention     | Absolute change <sup>#</sup> | Change per period (95% confidence intervals) |                     | Intervention effect (p-value) |
|-------------------------------|------------------|------------------------------|----------------------------------------------|---------------------|-------------------------------|
|                               |                  | T0–T2                        | T0–T1                                        | T1–T2               |                               |
| <b>ICIQ-LUTSqol</b>           | Change needed    | 0.12                         | -0.39 (-5.33; 4.54)                          | 0.51 (-4.89; 5.91)  | 0.960                         |
|                               | No change needed | 0.34                         | 0.89 (-2.81; 4.61)                           | -0.55 (-4.02; 2.92) |                               |
| <b>ICIQ-UI-SF</b>             | Change needed    | -2.37                        | -1.57 (-3.31; 0.16)                          | -0.80 (-2.71; 1.11) | 0.176                         |
|                               | No change needed | -0.31                        | -0.17 (-1.32; 0.98)                          | -0.14 (-1.28; 1.01) |                               |
| <b>ICIQ-PadPROM</b>           |                  |                              |                                              |                     |                               |
| Pad design & physical effects | Change needed    | -1.11                        | -1.41 (-2.74; -0.09)                         | 0.30 (-1.05; 1.65)  | 0.565                         |
|                               | No change needed | 0.46                         | -1.17 (-2.12; -0.21)                         | 0.71 (-0.24; 1.66)  |                               |
| Psychological effects         | Change needed    | -0.91                        | -0.99 (-2.08; 0.10)                          | 0.08 (-1.00; 1.17)  | 0.159                         |
|                               | No change needed | 0.41                         | 0.31 (-0.49; 1.10)                           | 0.10 (-0.69; 0.89)  |                               |
| Social effects                | Change needed    | 0.79                         | -0.03 (-1.50; 1.43)                          | 0.82 (-0.67; 2.31)  | 0.236                         |
|                               | No change needed | -0.69                        | -0.37 (-1.41; 0.66)                          | -0.32 (-1.33; 0.68) |                               |
| Leakage and burden of pad use | Change needed    | -0.70                        | -0.60 (-1.74; 0.55)                          | -0.10 (-1.26; 1.07) | 0.494                         |
|                               | No change needed | -0.02                        | -0.38 (-1.21; 0.44)                          | 0.36 (-0.44; 1.17)  |                               |
| <b>Satisfaction</b>           |                  |                              |                                              |                     |                               |
| Incontinence material         | Change needed    | 1.02                         | 1.37 (0.14; 2.59)                            | -0.35 (-1.62; 0.92) | 0.656                         |
|                               | No change needed | 0.55                         | 0.65 (-0.21; 1.50)                           | -0.10 (-0.97; 0.76) |                               |

---

|                   |                  |      |                    |                      |       |
|-------------------|------------------|------|--------------------|----------------------|-------|
| Incontinence care | Change needed    | 1.33 | 1.13 (-0.01; 2.27) | 0.20 (-0.95; 1.35)   | 0.209 |
|                   | No change needed | 0.11 | 1.00 (0.22; 1.77)  | -0.89 (-1.67; -0.11) |       |

---

Abbreviations: ICIQ = The International Consultation on Incontinence Questionnaire; LUTSqol = Lower Urinary Tract Symptoms Quality of Life Module; PadPROM = Absorbent Pads; T0 = baseline; T1 = 3 months' follow-up; 6 months' follow-up; UI-SF = Urinary Incontinence Short Form.

Improvement is a negative score for UI-SF, LUTSqol, and PadPROM and a positive score for satisfaction

# Absolute change was calculated form the model estimates
